# Supplementary material for: Tumor-Specificity, Neurotoxicity, and Possible Involvement of the Nuclear Receptor Response Pathway of 4,6,8-Trimethyl Azulene Amide Derivatives
Source: MDPI journal article supplement (doi:10.3390/ijms23052601), 2022-02-26
Supplement: s1 [file s1]

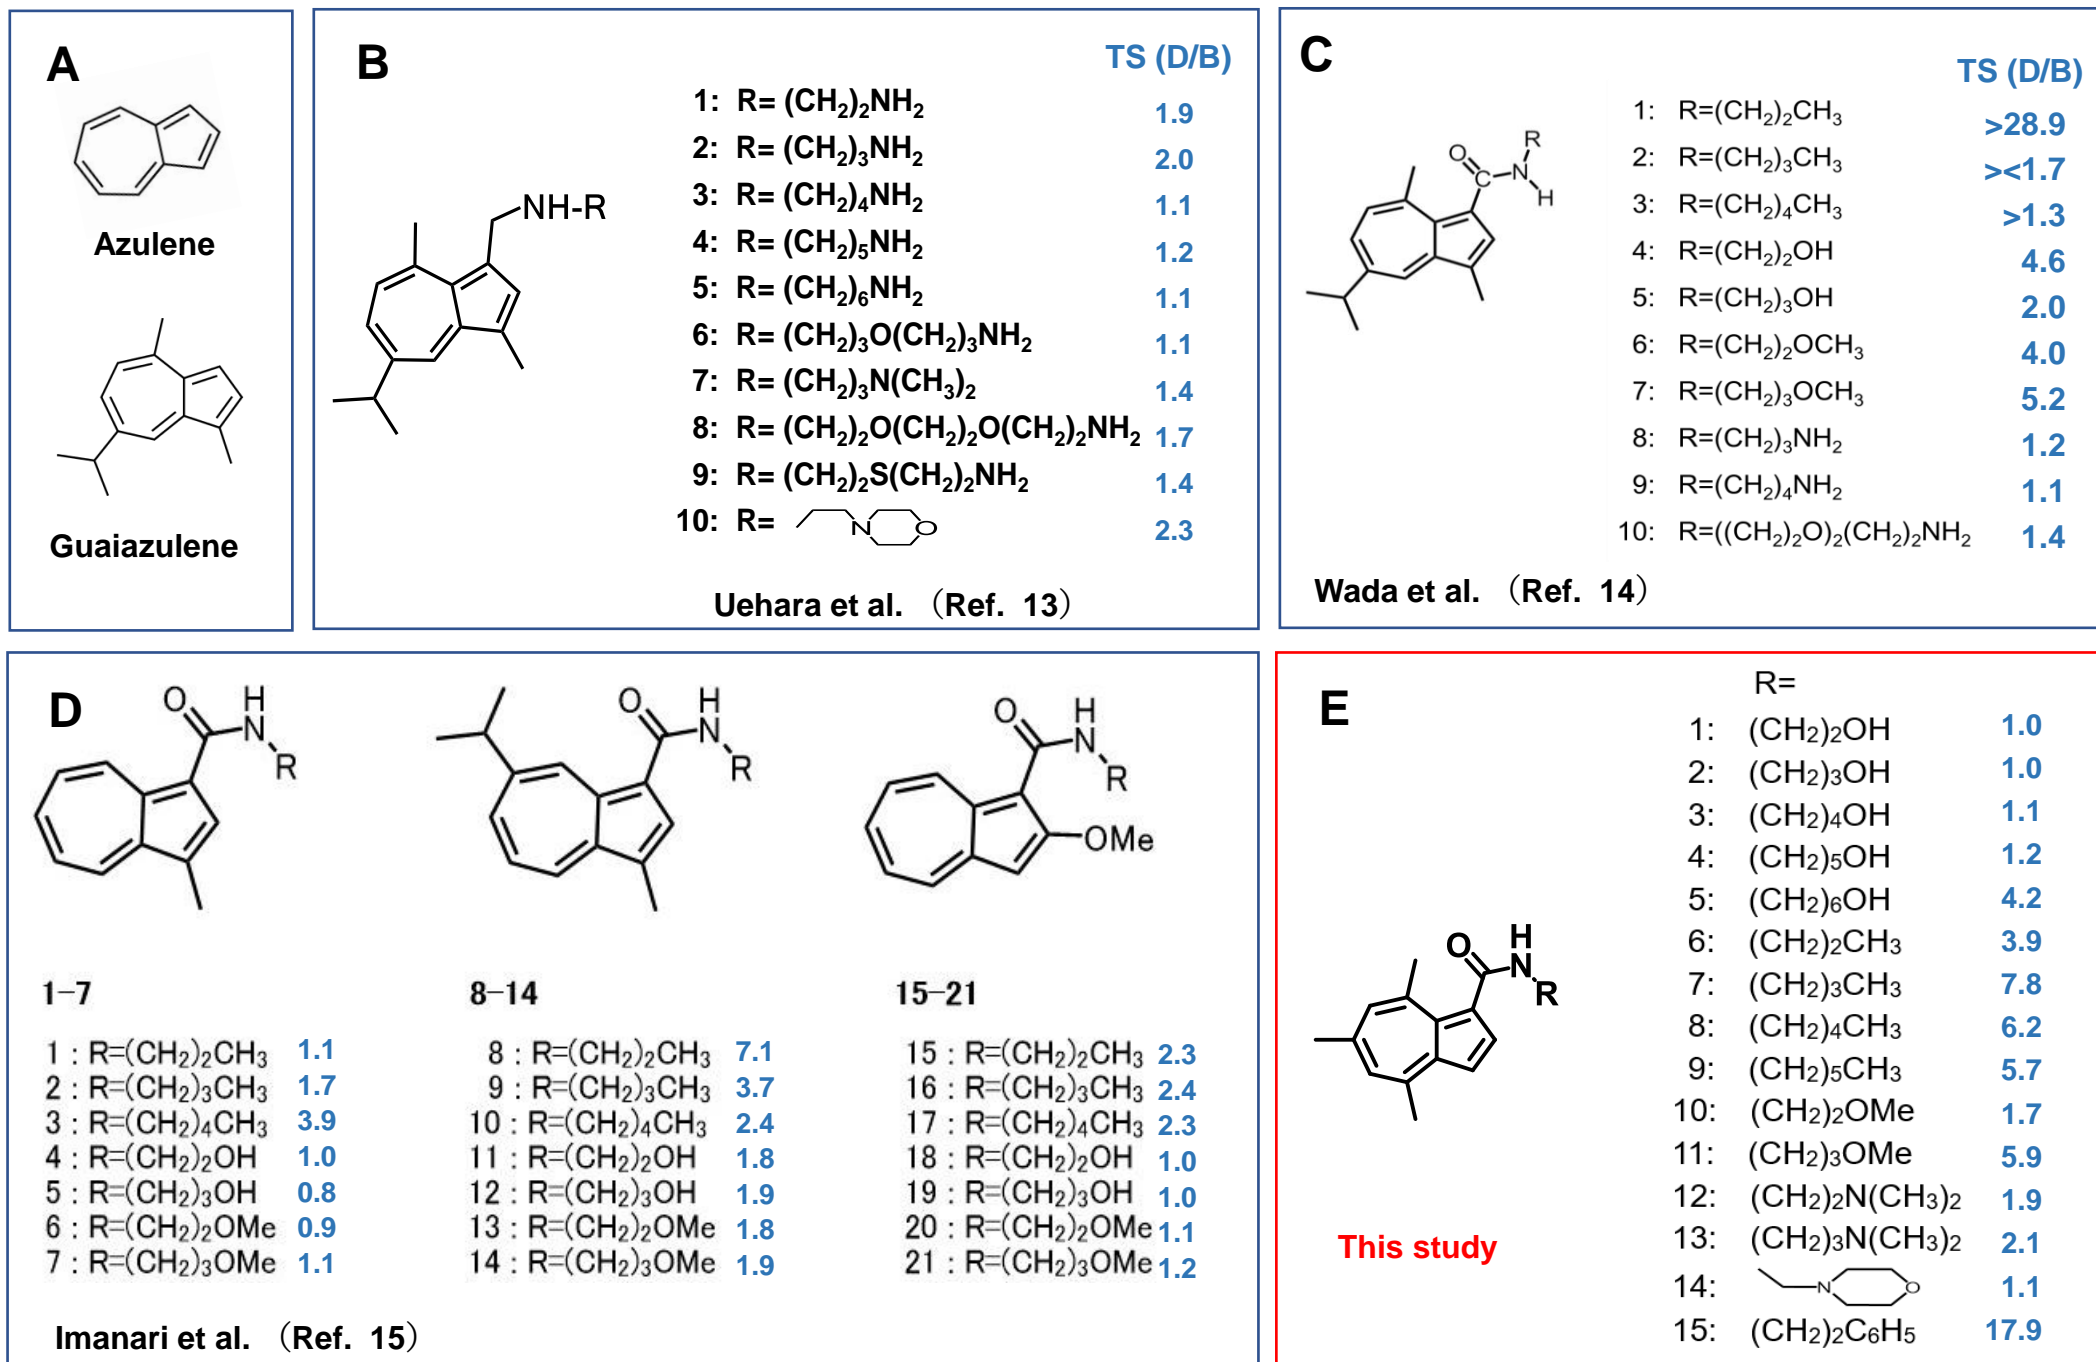

**Figure S1**

Structures of guaiazulene derivatives in our previous reports (B, C, D) and this study (E).

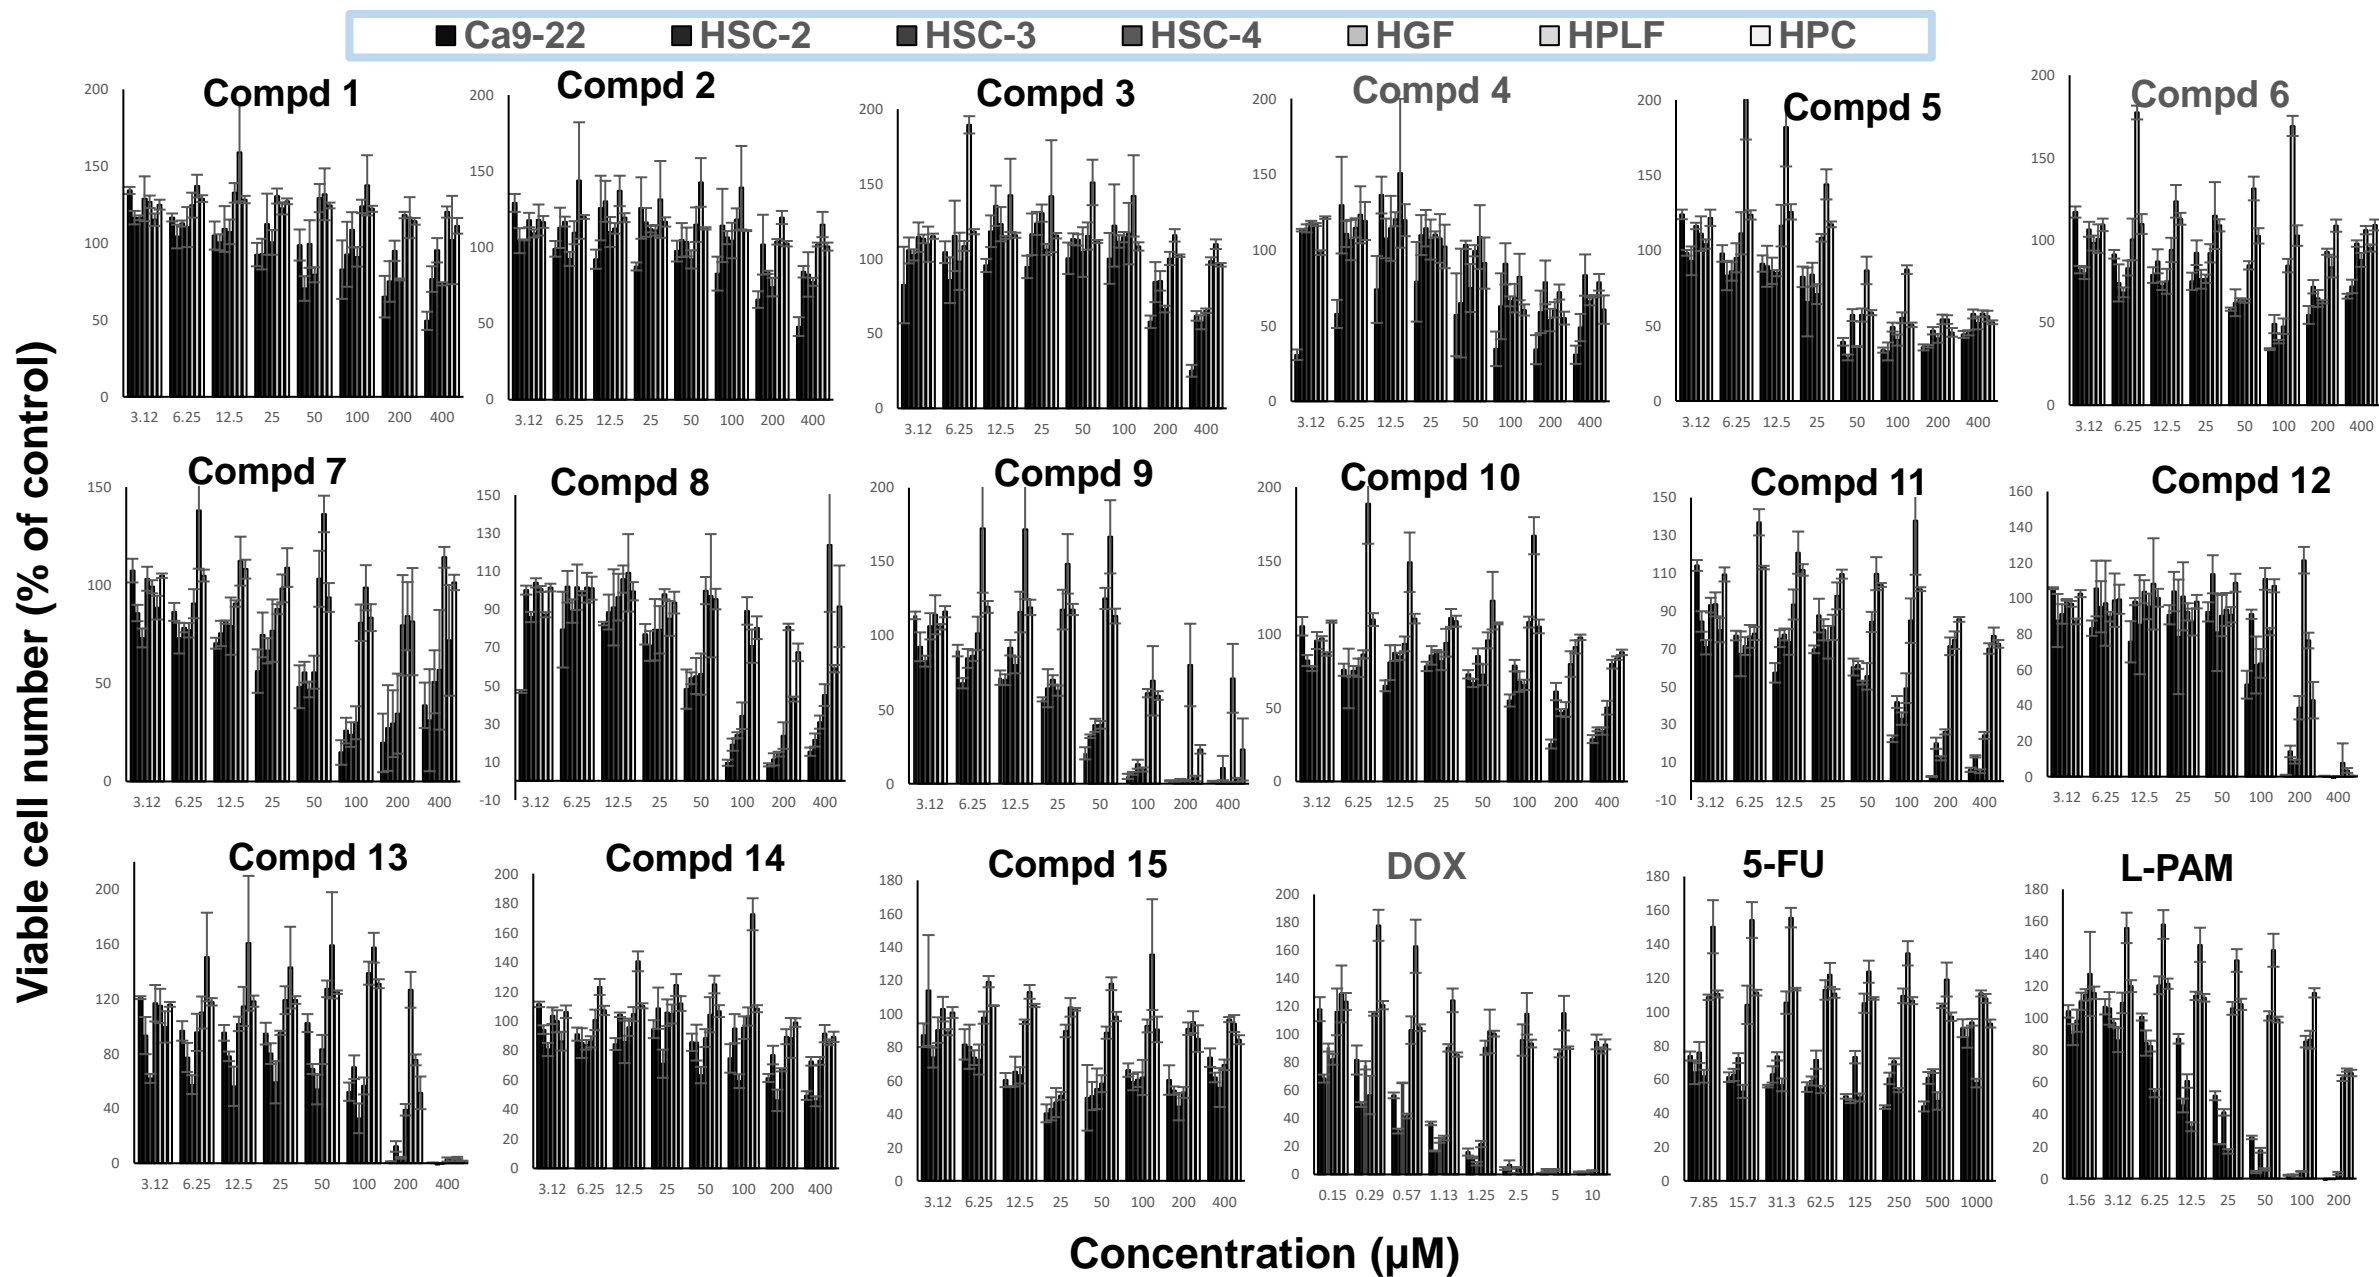

**Figure S2** (1<sup>st</sup> experiment of dose-response of compounds 1-10, DOX, 5-FU and L-PAM

Viable cell number (% of control)

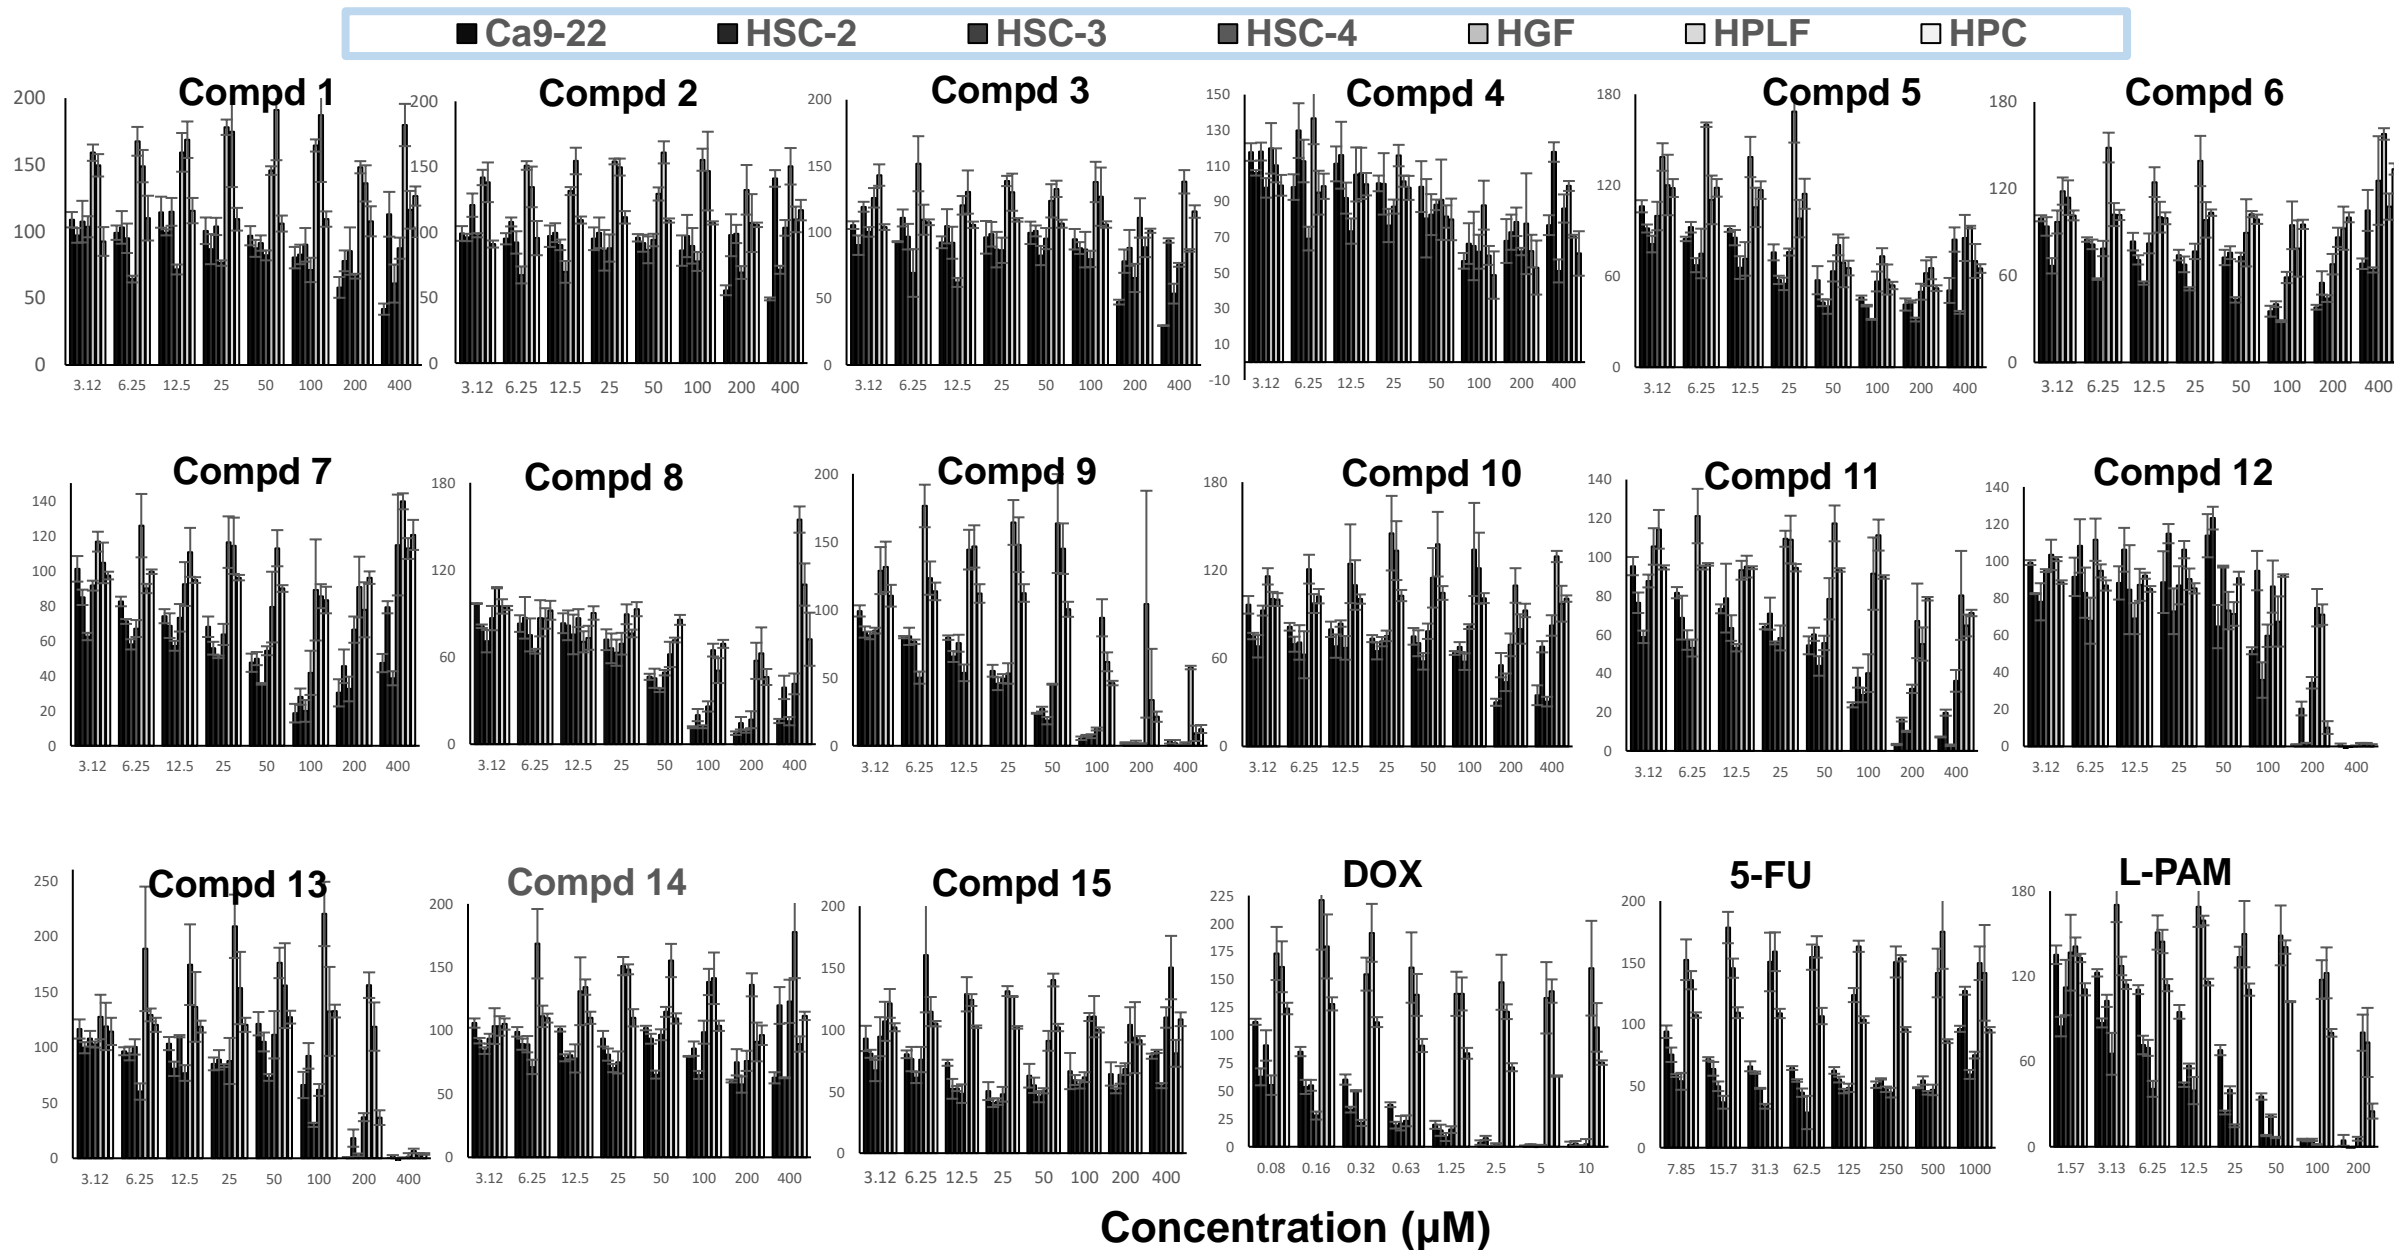

**Figure S3** (2<sup>nd</sup> experiment of dose-response of compounds 1-10, DOX, 5-FU and L-PAM

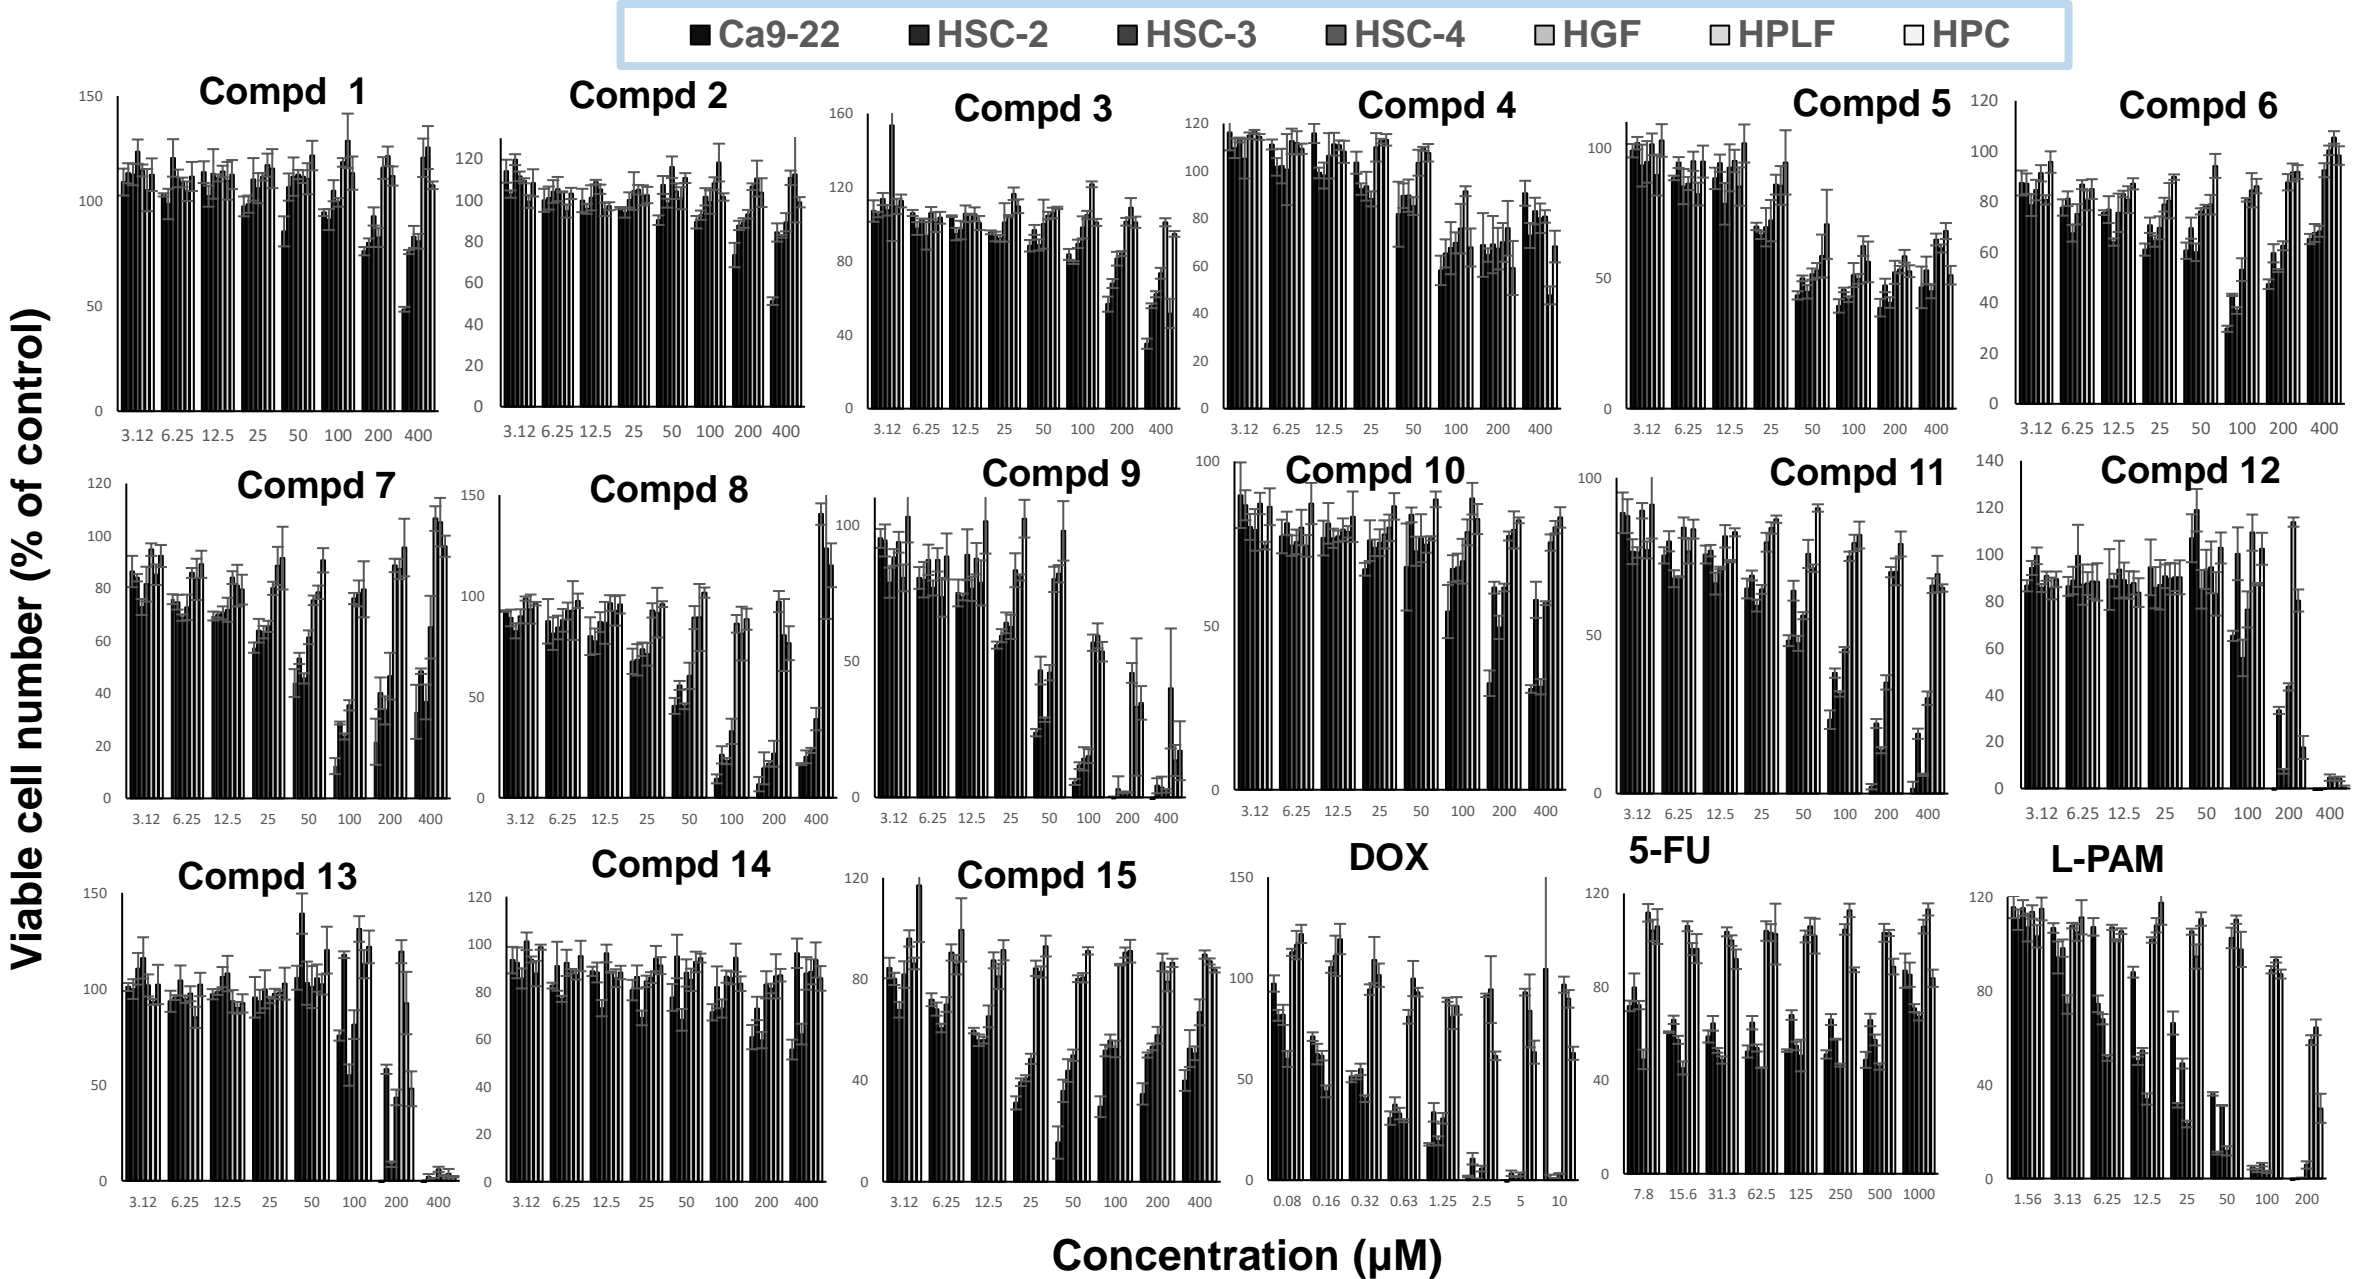

**Figure S4** (3<sup>rd</sup> experiment of dose-response of compounds 1-10, DOX, 5-FU and L-PAM

Sampling: 20210121      Applied protein: 15  $\mu$ g

Short expose

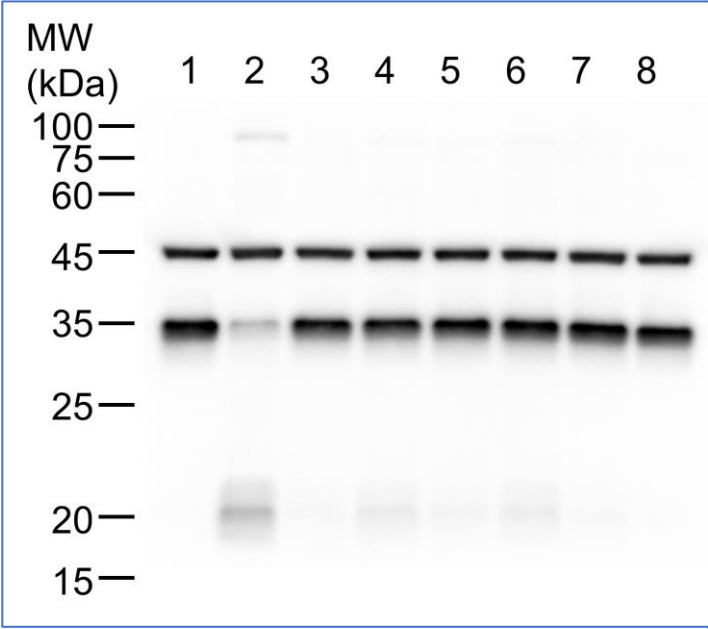

Middle exposure

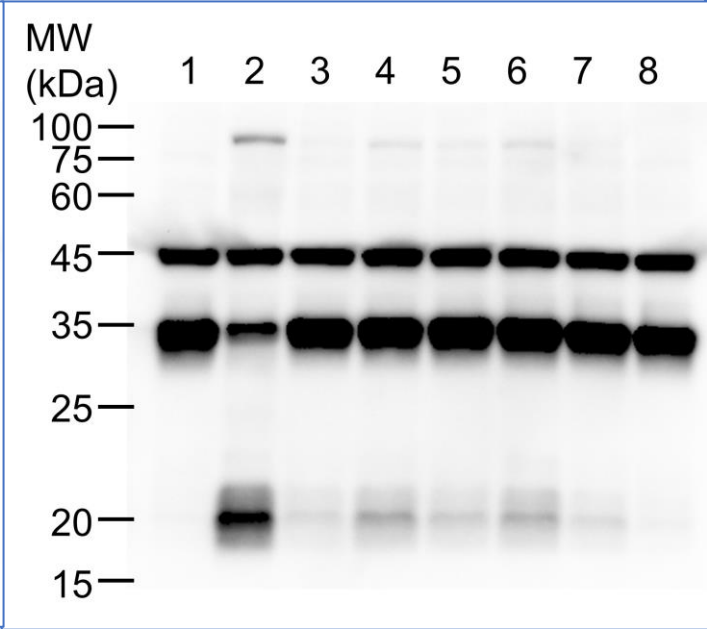

Long expose

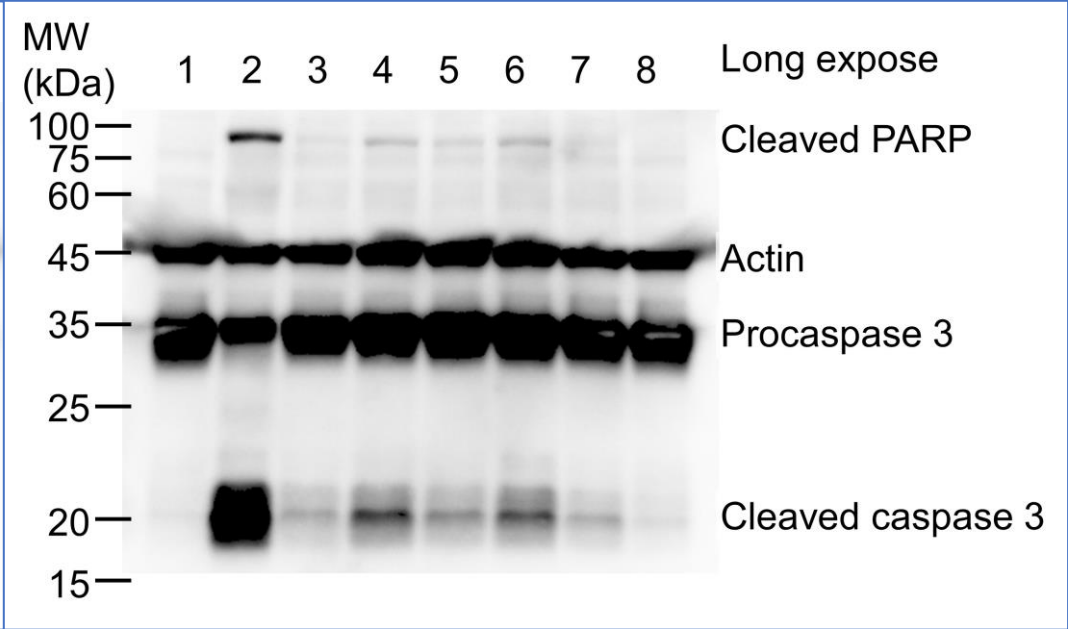

**Figure S5.** Raw data of stained gel and images after short and long exposure (without and with contrast adjustment)

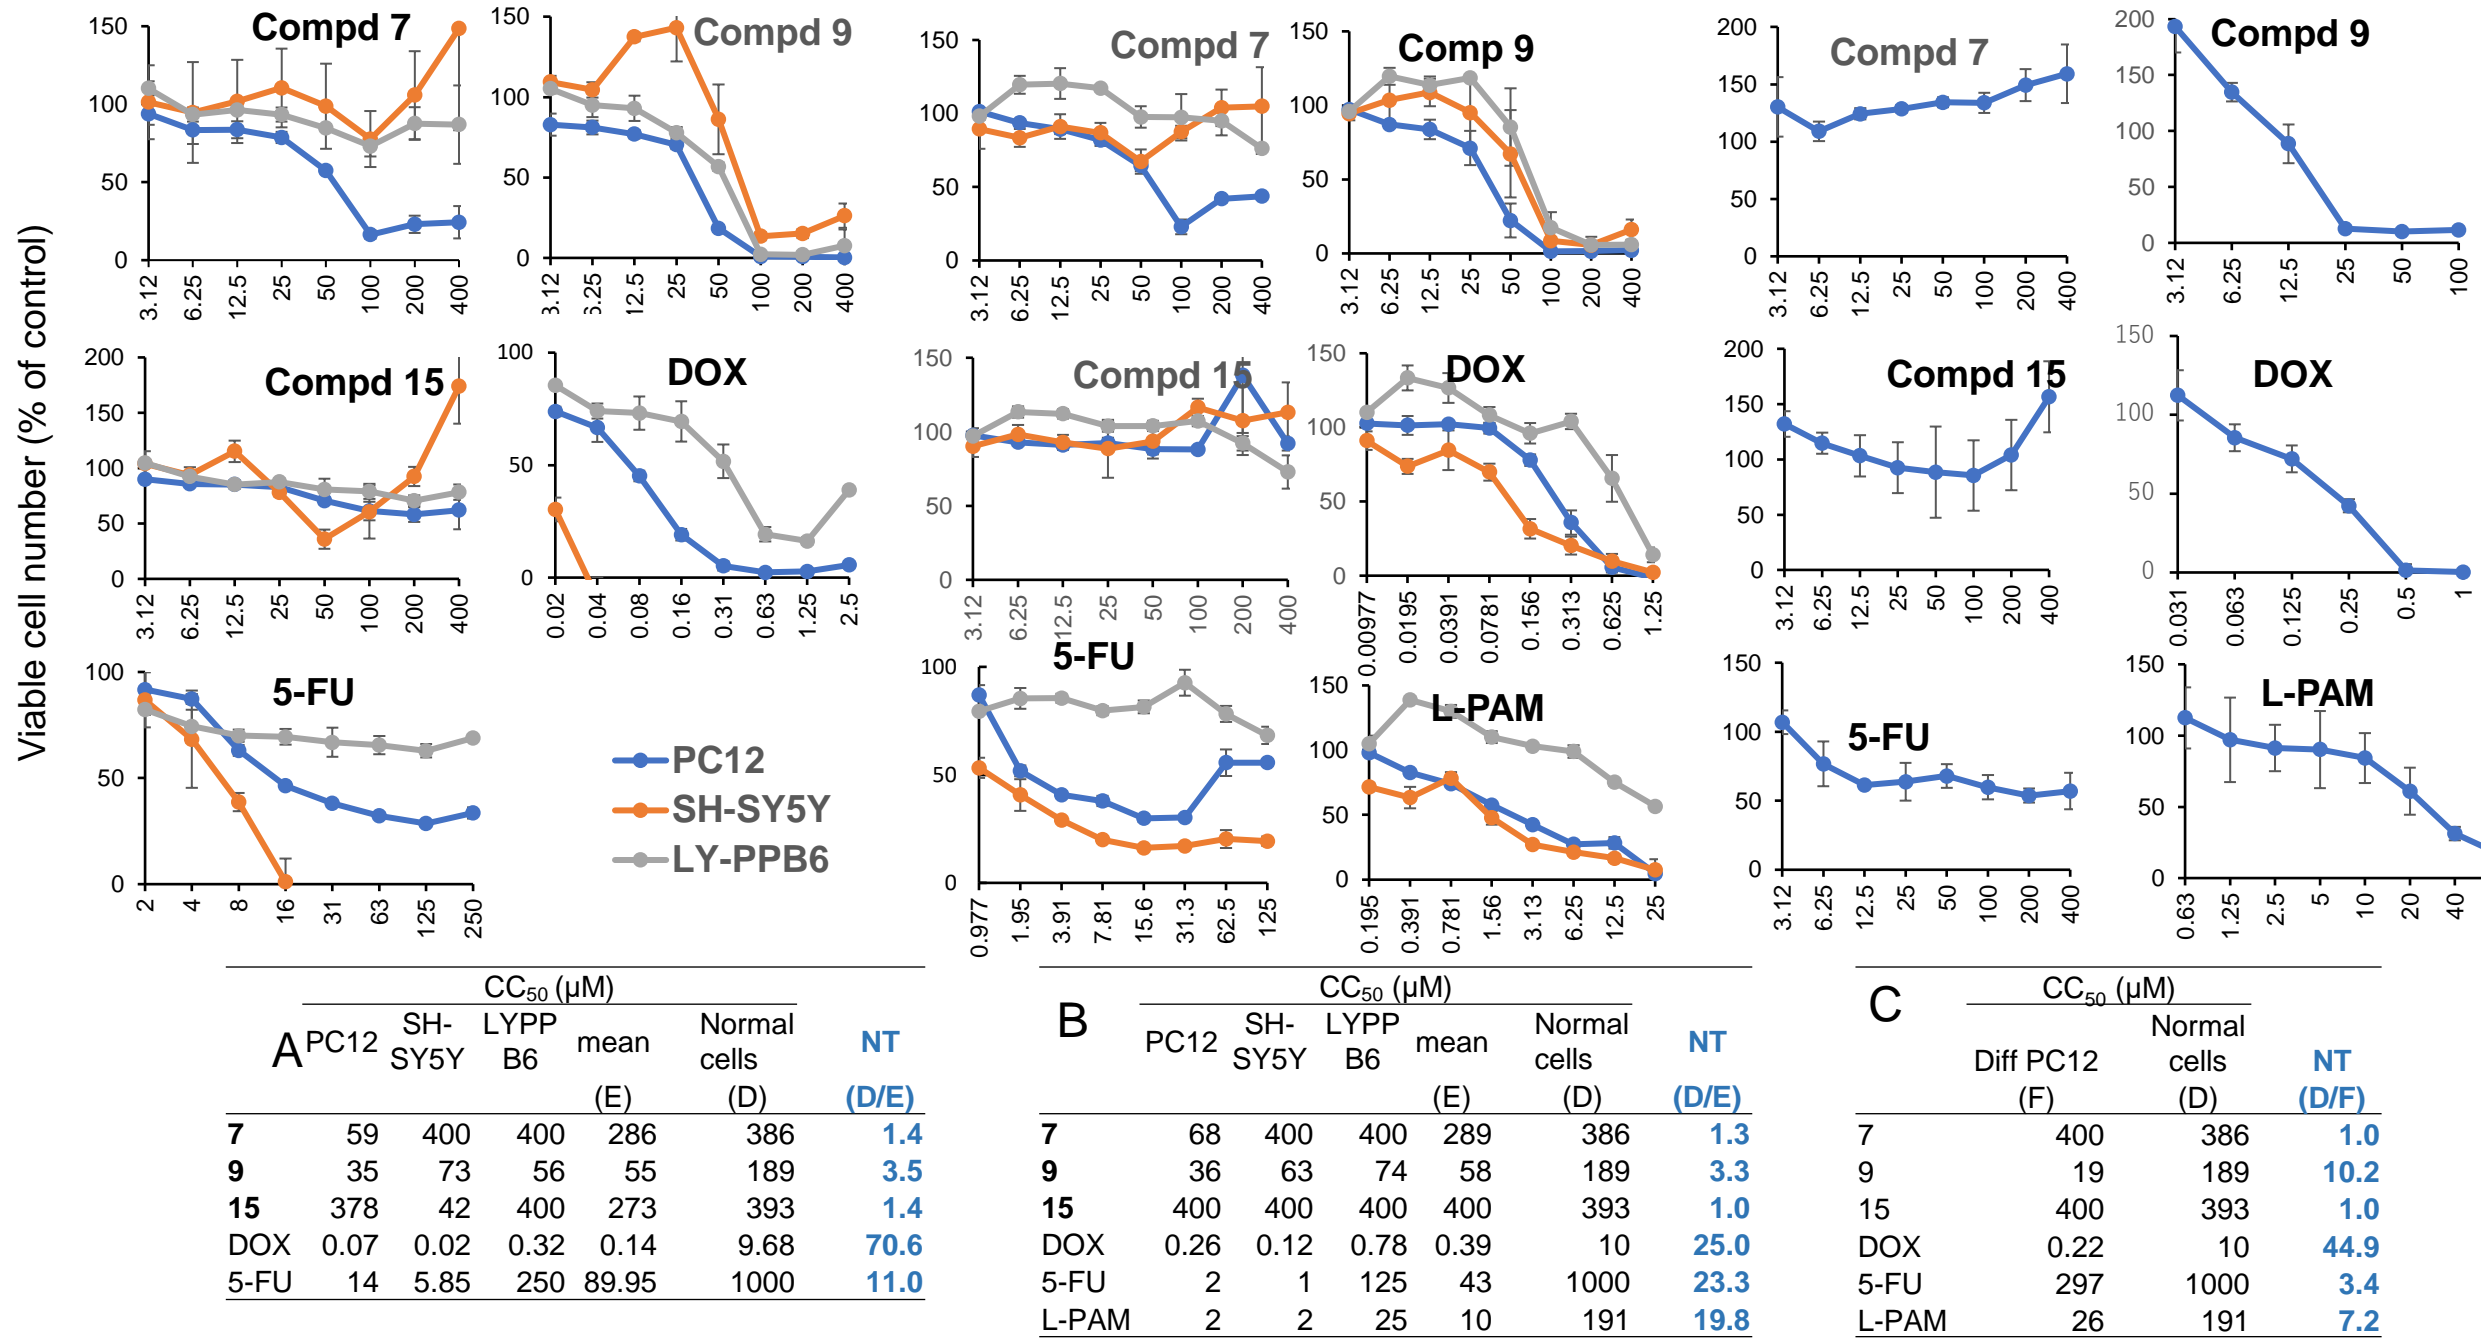

**Figure S6** Neurotoxicity of compounds 7, 8 and 9 in comparison with reference compounds

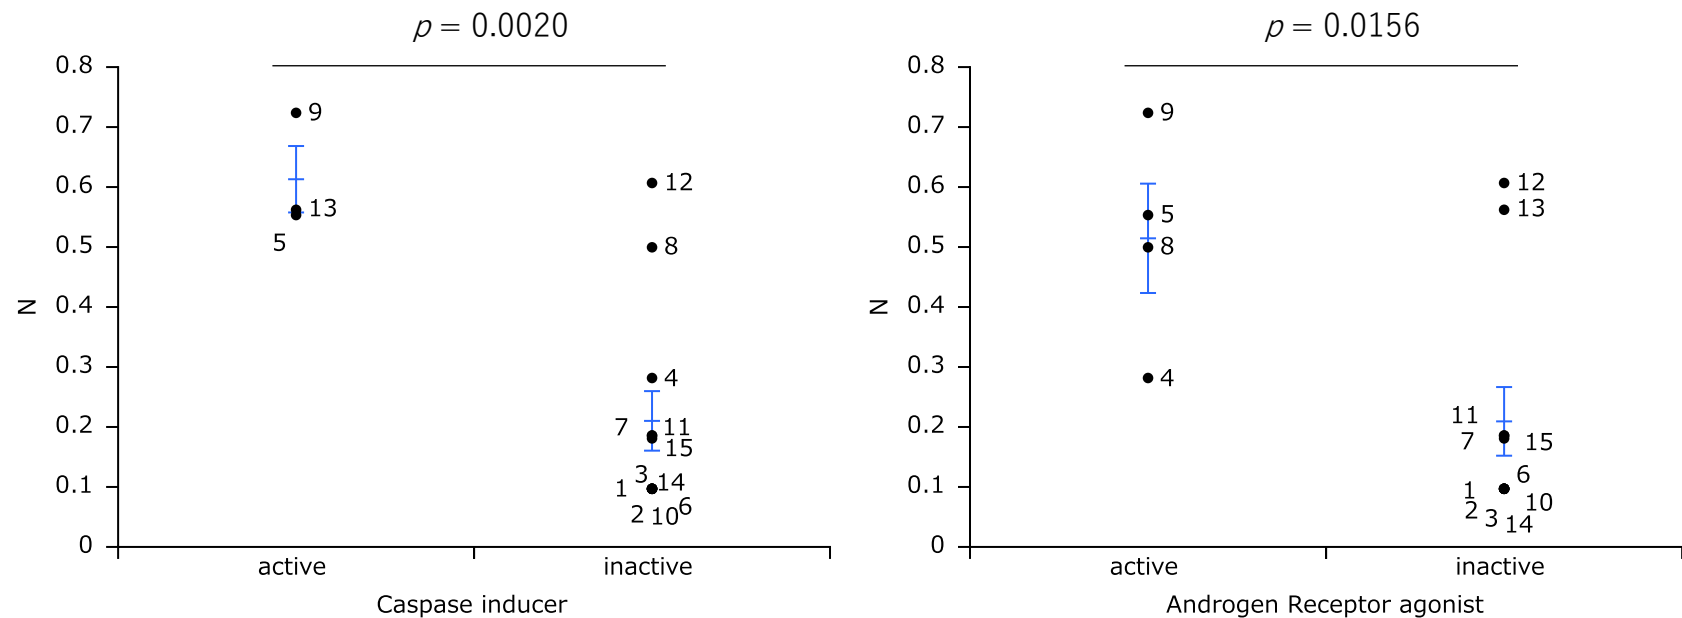

**Figure S7** Nuclear receptors and stress response pathways selectively associated with cytotoxicity against normal oral cells. The t-test was performed for cytotoxicity against humal normal oral cells (N) between azlene derivatives predicted as active and inactive in each biochemical pathway.



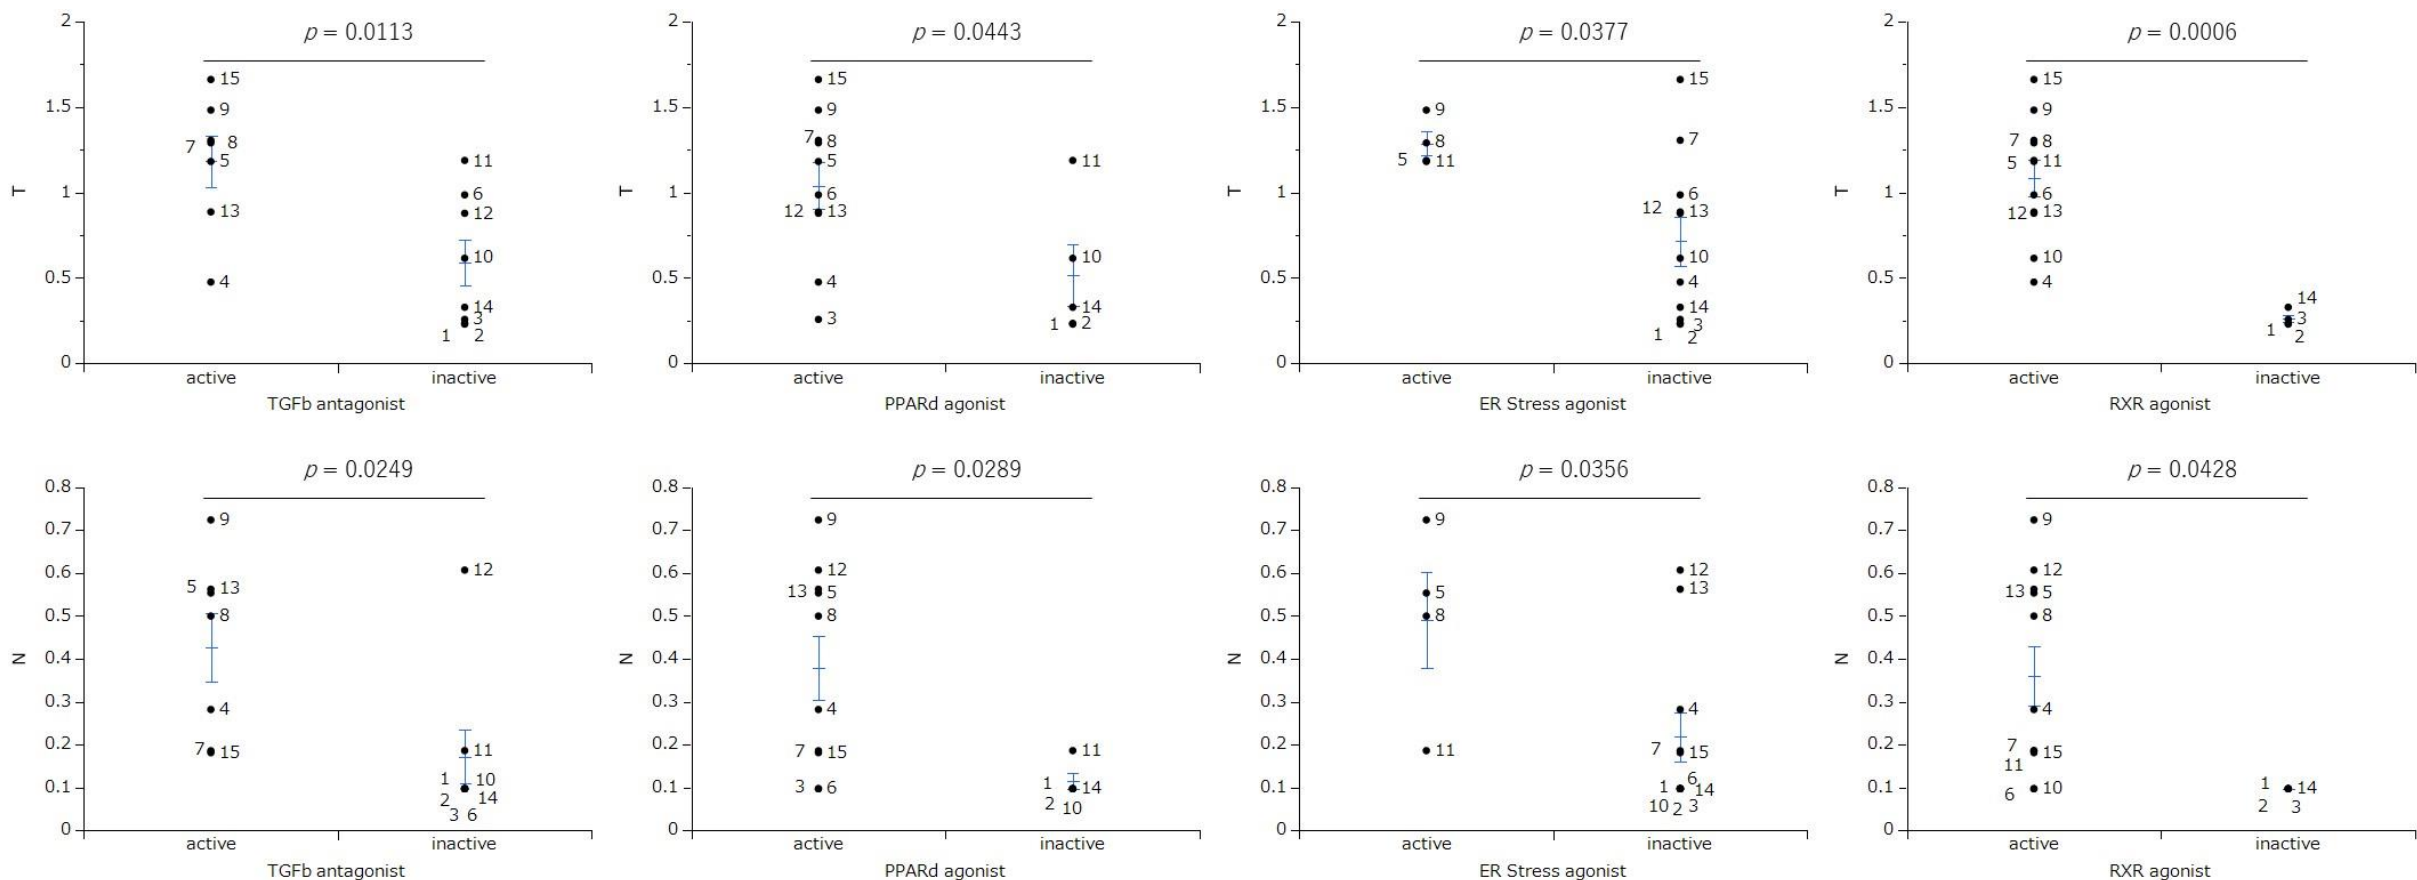

**Figure S8** Nuclear receptors and stress response pathways non-selectively associated with cytotoxicity against both normal oral cells and oral squamous cell carcinoma cell lines. The *t*-test was performed for cytotoxicity against both normal and tumor cytotoxicity (N, T) between azulene derivatives predicted as active and inactive in each biochemical pathway. TGFb, PPARd, ER Stress, and RXR are transforming growth factor  $\beta$ , peroxisome proliferator activated receptor  $\delta$ , endoplasmic reticulum stress, retinoid X receptor, respectively.



|       | CC <sub>50</sub> (μM)                         |       |        |       |       |       |        |                         |        |        |       |       |       |                        | Exp. 1                 |  |  |  |
|-------|-----------------------------------------------|-------|--------|-------|-------|-------|--------|-------------------------|--------|--------|-------|-------|-------|------------------------|------------------------|--|--|--|
|       | Human oral squamous cell carcinoma cell lines |       |        |       |       |       |        | Human normal oral cells |        |        |       |       |       |                        |                        |  |  |  |
|       | Ca9-22                                        |       | HSC-2  | HSC-3 | HSC-4 | mean  | SD     | HGF                     | HPLF   | HPC    | mean  | SD    | TS    |                        | PSE                    |  |  |  |
|       | (A)                                           |       |        |       |       |       | (C)    |                         |        | (D)    |       | (D/B) | (C/A) | (100D/B <sup>2</sup> ) | (100C/A <sup>2</sup> ) |  |  |  |
|       |                                               |       |        |       |       |       |        |                         |        |        |       |       |       |                        |                        |  |  |  |
| 1     | 327.7                                         | 400.0 | 400.0  | 400.0 | 381.9 | 36.2  | 400.0  | 400.0                   | 400.0  | 400.0  | 0.0   | 1.0   | 1.2   | 0.3                    | 0.4                    |  |  |  |
| 2     | 363.7                                         | 333.3 | 400.0  | 400.0 | 374.3 | 32.2  | 400.0  | 400.0                   | 400.0  | 400.0  | 0.0   | 1.1   | 1.1   | 0.3                    | 0.3                    |  |  |  |
| 3     | 247.3                                         | 400.0 | 400.0  | 400.0 | 333.3 | 345.2 | 72.4   | 400.0                   | 400.0  | 400.0  | 400.0 | 1.2   | 1.6   | 0.3                    | 0.7                    |  |  |  |
| 4     | 64.4                                          | 141.4 | 400.0  | 326.7 | 233.1 | 156.5 | 400.0  | 400.0                   | 400.0  | 400.0  | 0.0   | 1.7   | 6.2   | 0.7                    | 9.6                    |  |  |  |
| 5     | 43.9                                          | 32.4  | 111.5  | 39.9  | 56.9  | 36.7  | 400.0  | 400.0                   | 115.1  | 305.0  | 164.5 | 5.4   | 9.1   | 9.4                    | 20.8                   |  |  |  |
| 6     | 66.4                                          | 87.9  | 77.3   | 90.7  | 80.6  | 11.1  | 400.0  | 400.0                   | 400.0  | 400.0  | 0.0   | 5.0   | 6.0   | 6.2                    | 9.1                    |  |  |  |
| 7     | 36.3                                          | 59.6  | 46.0   | 59.0  | 50.2  | 11.2  | 400.0  | 270.7                   | 400.0  | 356.9  | 74.7  | 7.1   | 11.0  | 14.2                   | 30.4                   |  |  |  |
| 8     | 49.2                                          | 55.7  | 56.7   | 62.2  | 55.9  | 5.3   | 400.0  | 172.3                   | 400.0  | 324.1  | 131.4 | 5.8   | 8.1   | 10.4                   | 16.5                   |  |  |  |
| 9     | 29.7                                          | 34.4  | 41.7   | 39.1  | 36.2  | 5.3   | 400.0  | 126.1                   | 126.3  | 217.5  | 158.1 | 6.0   | 13.5  | 16.6                   | 45.3                   |  |  |  |
| 10    | 117.3                                         | 283.7 | 183.7  | 186.0 | 192.7 | 68.5  | 400.0  | 400.0                   | 400.0  | 400.0  | 0.0   | 2.1   | 3.4   | 1.1                    | 2.9                    |  |  |  |
| 11    | 63.0                                          | 79.6  | 55.3   | 92.0  | 72.5  | 16.5  | 400.0  | 400.0                   | 400.0  | 400.0  | 0.0   | 5.5   | 6.3   | 7.6                    | 10.1                   |  |  |  |
| 12    | 105.3                                         | 154.0 | 118.7  | 151.0 | 132.3 | 24.0  | 326.0  | 272.3                   | 190.7  | 263.0  | 68.1  | 2.0   | 3.1   | 1.5                    | 2.9                    |  |  |  |
| 13    | 105.2                                         | 134.0 | 34.6   | 133.3 | 101.8 | 46.8  | 322.3  | 270.0                   | 215.3  | 269.2  | 53.5  | 2.6   | 3.1   | 2.6                    | 2.9                    |  |  |  |
| 14    | 373.3                                         | 333.3 | 195.0  | 400.0 | 325.4 | 91.2  | 400.0  | 400.0                   | 400.0  | 400.0  | 0.0   | 1.2   | 1.1   | 0.4                    | 0.3                    |  |  |  |
| 15    | 19.1                                          | 19.8  | 55.3   | 24.3  | 29.6  | 17.3  | 400.0  | 400.0                   | 333.3  | 377.8  | 38.5  | 12.8  | 20.9  | 43.0                   | 109.6                  |  |  |  |
| DOX   | 0.41                                          | 0.16  | 0.43   | 0.20  | 0.30  | 0.14  | 10.00  | 7.08                    | 10.00  | 9.03   | 1.68  | 30.0  | 24.4  | 9986.4                 | 5929.5                 |  |  |  |
| 5-FU  | 124.0                                         | 109.0 | 1000.0 | 72.6  | 326.4 | 449.6 | 1000.0 | 1000.0                  | 1000.0 | 1000.0 | 0.0   | 3.1   | 8.1   | 0.9                    | 6.5                    |  |  |  |
| L-PAM | 27.1                                          | 11.9  | 19.3   | 9.3   | 16.9  | 8.0   | 200.0  | 200.0                   | 200.0  | 200.0  | 0.0   | 11.8  | 7.4   | 70.2                   | 27.3                   |  |  |  |

| CC <sub>50</sub> (μM)                         |       |        |       |       |       |                         |        |        |        |        |       |      |      |         | Exp. 2 |  |     |  |
|-----------------------------------------------|-------|--------|-------|-------|-------|-------------------------|--------|--------|--------|--------|-------|------|------|---------|--------|--|-----|--|
| Human oral squamous cell carcinoma cell lines |       |        |       |       |       | Human normal oral cells |        |        |        |        | TS    |      |      |         |        |  | PSE |  |
| Ca9-22                                        | HSC-2 | HSC-3  | HSC-4 | mean  | SD    | HGF                     | HPLF   | HPC    | mean   | SD     |       |      |      |         |        |  |     |  |
| (A)                                           | (B)   |        |       |       |       | (C)                     | (D)    |        |        |        |       |      |      |         |        |  |     |  |
| 1                                             | 287.3 | 400.0  | 392.3 | 400.0 | 369.9 | 55.2                    | 400.0  | 400.0  | 400.0  | 400.0  | 0.0   | 1.1  | 1.4  | 0.3     | 0.5    |  |     |  |
| 2                                             | 376.7 | 400.0  | 400.0 | 400.0 | 394.2 | 11.7                    | 400.0  | 400.0  | 400.0  | 400.0  | 0.0   | 1.0  | 1.1  | 0.3     | 0.3    |  |     |  |
| 3                                             | 194.0 | 400.0  | 400.0 | 400.0 | 348.5 | 103.0                   | 400.0  | 400.0  | 400.0  | 400.0  | 0.0   | 1.1  | 2.1  | 0.3     | 1.1    |  |     |  |
| 4                                             | 400.0 | 400.0  | 283.0 | 400.0 | 370.8 | 58.5                    | 400.0  | 400.0  | 400.0  | 400.0  | 0.0   | 1.1  | 1.0  | 0.3     | 0.3    |  |     |  |
| 5                                             | 72.8  | 37.7   | 33.7  | 221.7 | 91.5  | 88.6                    | 400.0  | 291.7  | 200.0  | 297.2  | 100.1 | 3.2  | 5.5  | 3.6     | 7.5    |  |     |  |
| 6                                             | 80.3  | 86.3   | 28.4  | 400.0 | 148.7 | 169.5                   | 400.0  | 400.0  | 400.0  | 400.0  | 0.0   | 2.7  | 5.0  | 1.8     | 6.2    |  |     |  |
| 7                                             | 47.2  | 49.5   | 26.6  | 57.7  | 45.2  | 13.2                    | 400.0  | 400.0  | 400.0  | 400.0  | 0.0   | 8.8  | 8.5  | 19.5    | 18.0   |  |     |  |
| 8                                             | 46.3  | 43.1   | 36.4  | 49.1  | 43.7  | 5.5                     | 264.7  | 228.2  | 184.0  | 225.6  | 40.4  | 5.2  | 5.7  | 11.8    | 12.3   |  |     |  |
| 9                                             | 28.7  | 22.8   | 25.0  | 22.7  | 24.8  | 2.8                     | 331.3  | 174.7  | 96.5   | 200.8  | 119.6 | 8.1  | 11.5 | 32.6    | 40.1   |  |     |  |
| 10                                            | 140.7 | 327.3  | 157.3 | 400.0 | 256.3 | 127.6                   | 400.0  | 400.0  | 400.0  | 400.0  | 0.0   | 1.6  | 2.8  | 0.6     | 2.0    |  |     |  |
| 11                                            | 57.1  | 72.4   | 38.3  | 73.7  | 60.4  | 16.6                    | 400.0  | 266.7  | 400.0  | 355.6  | 77.0  | 5.9  | 7.0  | 9.8     | 12.3   |  |     |  |
| 12                                            | 103.7 | 159.7  | 74.5  | 137.0 | 118.7 | 37.4                    | 267.3  | 261.0  | 151.7  | 226.7  | 65.0  | 1.9  | 2.6  | 1.6     | 2.5    |  |     |  |
| 13                                            | 123.0 | 156.7  | 76.5  | 145.7 | 125.5 | 35.5                    | 342.0  | 316.0  | 186.3  | 281.4  | 83.4  | 2.2  | 2.8  | 1.8     | 2.3    |  |     |  |
| 14                                            | 400.0 | 400.0  | 333.3 | 400.0 | 383.3 | 33.3                    | 400.0  | 400.0  | 400.0  | 400.0  | 0.0   | 1.0  | 1.0  | 0.3     | 0.3    |  |     |  |
| 15                                            | 24.0  | 14.0   | 15.5  | 16.6  | 17.5  | 4.4                     | 400.0  | 400.0  | 400.0  | 400.0  | 0.0   | 22.8 | 16.7 | 130.2   | 69.6   |  |     |  |
| DOX                                           | 0.5   | 0.2    | 0.3   | 0.1   | 0.2   | 0.2                     | 10.0   | 10.0   | 10.0   | 10.0   | 0.0   | 40.7 | 22.1 | 16524.6 | 4901.9 |  |     |  |
| 5-FU                                          | 314.0 | 1000.0 | 20.4  | 9.5   | 336.0 | 464.6                   | 1000.0 | 1000.0 | 1000.0 | 1000.0 | 0.0   | 3.0  | 3.2  | 0.9     | 1.0    |  |     |  |
| L-PAM                                         | 38.7  | 11.0   | 17.5  | 4.9   | 18.0  | 14.7                    | 200.0  | 200.0  | 155.0  | 185.0  | 26.0  | 10.3 | 5.2  | 56.9    | 13.3   |  |     |  |

|       | CC <sub>50</sub> (μM)                         |      |      |      |      |       |      |                         |      |      |       |      |       |         | Exp.3                  |                        |  |  |
|-------|-----------------------------------------------|------|------|------|------|-------|------|-------------------------|------|------|-------|------|-------|---------|------------------------|------------------------|--|--|
|       | Human oral squamous cell carcinoma cell lines |      |      |      |      |       |      | Human normal oral cells |      |      |       |      |       |         |                        |                        |  |  |
|       | Ca9-22HSC-2HSC-3HSC-4 mean                    |      |      |      |      |       | SD   | HGF HPLF HPC mean       |      |      |       |      | SD    | TS      |                        | PSE                    |  |  |
|       |                                               |      |      |      |      |       |      |                         |      |      |       |      |       |         |                        |                        |  |  |
|       | (A)                                           | (B)  |      |      |      |       | (C)  | (D)                     |      |      |       |      | (D/B) | (C/A)   | (100D/B <sup>2</sup> ) | (100C/A <sup>2</sup> ) |  |  |
| 1     | 390                                           | 400  | 400  | 400  | 398  | 4.8   | 400  | 400                     | 400  | 400  | 0.0   | 1.0  | 1.0   | 0.3     | 0.3                    |                        |  |  |
| 2     | 398                                           | 400  | 400  | 400  | 399  | 1.2   | 400  | 400                     | 400  | 400  | 0.0   | 1.0  | 1.0   | 0.3     | 0.3                    |                        |  |  |
| 3     | 259                                           | 400  | 400  | 400  | 365  | 70.5  | 400  | 400                     | 400  | 400  | 0.0   | 1.1  | 1.5   | 0.3     | 0.6                    |                        |  |  |
| 4     | 400                                           | 400  | 400  | 400  | 400  | 0.0   | 400  | 375                     | 331  | 368  | 35.1  | 0.9  | 1.0   | 0.2     | 0.3                    |                        |  |  |
| 5     | 44                                            | 52   | 44   | 58   | 50   | 6.8   | 80   | 400                     | 231  | 237  | 160.1 | 4.8  | 1.8   | 9.6     | 4.2                    |                        |  |  |
| 6     | 66                                            | 87   | 71   | 100  | 81   | 15.3  | 400  | 400                     | 400  | 400  | 0.0   | 4.9  | 6.0   | 6.1     | 9.1                    |                        |  |  |
| 7     | 41                                            | 56   | 44   | 72   | 53   | 14.0  | 400  | 400                     | 400  | 400  | 0.0   | 7.5  | 9.7   | 14.0    | 23.3                   |                        |  |  |
| 8     | 45                                            | 58   | 46   | 69   | 55   | 11.6  | 400  | 400                     | 400  | 400  | 0.0   | 7.3  | 8.9   | 13.5    | 20.0                   |                        |  |  |
| 9     | 29                                            | 44   | 35   | 44   | 38   | 7.3   | 163  | 168                     | 115  | 149  | 29.4  | 3.9  | 5.5   | 10.2    | 18.9                   |                        |  |  |
| 10    | 115                                           | 400  | 203  | 400  | 279  | 143.9 | 400  | 400                     | 400  | 400  | 0.0   | 1.4  | 3.5   | 0.5     | 3.0                    |                        |  |  |
| 11    | 48                                            | 77   | 45   | 79   | 62   | 18.3  | 400  | 400                     | 400  | 400  | 0.0   | 6.4  | 8.4   | 10.3    | 17.7                   |                        |  |  |
| 12    | 123                                           | 174  | 111  | 179  | 147  | 34.8  | 316  | 279                     | 162  | 252  | 80.7  | 1.7  | 2.6   | 1.2     | 2.1                    |                        |  |  |
| 13    | 133                                           | 229  | 110  | 182  | 163  | 52.9  | 319  | 293                     | 203  | 272  | 60.7  | 1.7  | 2.4   | 1.0     | 1.8                    |                        |  |  |
| 14    | 400                                           | 400  | 400  | 400  | 400  | 0.0   | 400  | 400                     | 400  | 400  | 0.0   | 1.0  | 1.0   | 0.3     | 0.3                    |                        |  |  |
| 15    | 17                                            | 17   | 17   | 24   | 19   | 3.4   | 400  | 400                     | 400  | 400  | 0.0   | 21.5 | 24.0  | 115.4   | 144.6                  |                        |  |  |
| DOX   | 0.33                                          | 0.34 | 0.38 | 0.13 | 0.29 | 0.11  | 10   | 10                      | 10   | 10   | 0.0   | 34.0 | 29.9  | 11536.5 | 8964.1                 |                        |  |  |
| 5-FU  | 136                                           | 1000 | 1000 | 17   | 538  | 535.5 | 1000 | 1000                    | 1000 | 1000 | 0.0   | 1.9  | 7.4   | 0.3     | 5.4                    |                        |  |  |
| L-PAM | 38                                            | 13   | 23   | 7    | 20   | 13.8  | 200  | 200                     | 165  | 188  | 20.0  | 9.3  | 5.2   | 45.9    | 13.7                   |                        |  |  |

|               | r_pearson   | r2         | p_value    |               | r_pearson   | r2         | p_value    |              | r_pearson   | r2         | p_value    |             | r_pearson   | r2         | p_value    |             | r_pearson   | r2         | p_value    |
|---------------|-------------|------------|------------|---------------|-------------|------------|------------|--------------|-------------|------------|------------|-------------|-------------|------------|------------|-------------|-------------|------------|------------|
| AATSC0v       | 0.8410942   | 0.70743946 | 8.5281E-05 | vsurf_ID2     | -0.70755708 | 0.50063702 | 0.00316975 | AATSC0Z      | -0.65236064 | 0.4255744  | 0.00839112 | PEOE_VSA_P  | -0.60192894 | 0.36231844 | 0.01758712 | GATS1dv     | -0.561438   | 0.31521263 | 0.02942116 |
| GATS1se       | -0.83325773 | 0.69431845 | 0.00011431 | ATSC0c        | -0.70674683 | 0.49949109 | 0.00322024 | vsurf_D3     | 0.65139796  | 0.4243193  | 0.00852067 | AATSC7i     | 0.60155067  | 0.3618632  | 0.01767718 | MATS1s      | 0.56014385  | 0.31376113 | 0.02987893 |
| FASA_H        | 0.81940379  | 0.67142257 | 0.00018535 | ETA_dEpsilon  | 0.70670776  | 0.49943586 | 0.00322269 | vsurf_D4     | 0.65124973  | 0.42412622 | 0.00854075 | AATS0se     | -0.60030223 | 0.36036277 | 0.01797694 | nC          | 0.55964921  | 0.31320723 | 0.0300553  |
| FASA_P        | -0.81940369 | 0.6714224  | 0.00018535 | SM1_Dzare     | -0.70016623 | 0.49023275 | 0.00365452 | vsurf_HB3    | -0.65112747 | 0.42396699 | 0.00855735 | Q_VSA_PP    | -0.59806477 | 0.35768147 | 0.01852392 | GATS7i      | -0.55865593 | 0.31209645 | 0.03041185 |
| GATS4s        | 0.81774718  | 0.66871046 | 0.00019585 | AATSC0c       | -0.70004773 | 0.49006682 | 0.00366275 | AATSC0m      | -0.64974086 | 0.42216318 | 0.00874734 | AATSC0s     | -0.59737757 | 0.35685996 | 0.01869445 | EState_VSA2 | -0.5565865  | 0.30978853 | 0.03116491 |
| vsurf_CW5     | -0.81702439 | 0.66752886 | 0.00020058 | MAXaasC       | 0.69791244  | 0.48708177 | 0.00381353 | Q_VSA_FPPC   | -0.64915037 | 0.4213962  | 0.00882924 | ATSC1s      | 0.59676898  | 0.35613322 | 0.01884648 | MAXaaCH     | 0.55494481  | 0.30796374 | 0.03177224 |
| AMID_C        | 0.81139109  | 0.6583555  | 0.00024077 | vsurf_ID3     | -0.6973885  | 0.48635072 | 0.00385127 | vsurf_IW2    | -0.64675264 | 0.41828898 | 0.009168   | MATS7i      | 0.5949919   | 0.35401537 | 0.01929583 | density     | -0.5547097  | 0.30770286 | 0.03185993 |
| ASA_P         | -0.8057693  | 0.64926417 | 0.00028722 | SM1_Dzpe      | -0.6968113  | 0.48554598 | 0.00389319 | chi1_C       | 0.64667355  | 0.41818667 | 0.00917934 | Mse         | -0.59409478 | 0.35294861 | 0.01952577 | MID_C       | 0.55351938  | 0.30638371 | 0.03230674 |
| vsurf_W5      | -0.80175046 | 0.6428038  | 0.00032473 | vsurf_ID5     | -0.69039439 | 0.47664441 | 0.00438415 | AATS1are     | -0.64655277 | 0.41803049 | 0.00919669 | MATS2se     | 0.59349774  | 0.35223957 | 0.01967995 | MATS8se     | -0.55332041 | 0.30616348 | 0.03238188 |
| a_donacc      | -0.7961373  | 0.6338346  | 0.00038373 | SM1_Dzm       | -0.68948565 | 0.47539046 | 0.00445747 | GATS8i       | -0.64627844 | 0.41767582 | 0.00923618 | vsa_pol     | -0.59239338 | 0.35092992 | 0.01996761 | GATS8p      | -0.55250144 | 0.30525784 | 0.03269256 |
| vsurf_HL1     | -0.79582979 | 0.63334505 | 0.0003872  | SM1_DzZ       | -0.68944675 | 0.47533682 | 0.00446063 | GATS5s       | 0.64373621  | 0.41439631 | 0.00960851 | AATSC1s     | 0.59128242  | 0.3496149  | 0.02026022 | AATS0s      | -0.55127157 | 0.30390034 | 0.03316331 |
| AATS1i        | -0.7952043  | 0.63234989 | 0.00039434 | SM1_Dzse      | -0.68835594 | 0.4738339  | 0.00454998 | GATS5c       | 0.64323961  | 0.41375719 | 0.00968259 | MATS8p      | 0.59097859  | 0.3492557  | 0.02034081 | TASA        | 0.54946096  | 0.30190734 | 0.03386559 |
| vsurf_CP      | 0.79291096  | 0.62870779 | 0.00042142 | RASA          | 0.68811721  | 0.4735053  | 0.00456972 | vsurf_D2     | 0.64120547  | 0.41114446 | 0.0099907  | AATSC8p     | 0.59088547  | 0.34914564 | 0.02036556 | Mare        | -0.54898016 | 0.30137921 | 0.03405394 |
| AATSC0p       | 0.78921951  | 0.62286744 | 0.0004682  | opr_violation | 0.68692287  | 0.47186303 | 0.00466951 | vsurf_ID7    | -0.6403085  | 0.40999497 | 0.01012897 | Q_VSA_FPNE  | -0.58954866 | 0.34756762 | 0.02072341 | BIC1        | -0.54699463 | 0.29920312 | 0.03484007 |
| FNSA5         | 0.78537572  | 0.61681502 | 0.00052132 | vsurf_W3      | -0.68533991 | 0.46969079 | 0.00480443 | GATS6c       | 0.63925736  | 0.40864997 | 0.0102929  | RNCS        | -0.58836052 | 0.3461681  | 0.02104548 | EState_VSA9 | -0.54311952 | 0.29497881 | 0.03641341 |
| PEOE_VSA-1    | 0.78475391  | 0.6158387  | 0.00053036 | vsurf_D5      | 0.68266608  | 0.46603297 | 0.00503932 | GATS5are     | 0.63851263  | 0.40769838 | 0.01041029 | PEOE_VSA_P  | -0.58737815 | 0.34501309 | 0.02131464 | PNSA5       | 0.53933043  | 0.29087732 | 0.0380026  |
| vsurf_W4      | -0.77246221 | 0.59669787 | 0.00073689 | AATSC8i       | 0.68114863  | 0.46396345 | 0.00517661 | vsurf_CW1    | -0.63410102 | 0.4020841  | 0.01112725 | ATSC7i      | 0.58732586  | 0.34495167 | 0.02132904 | MINaaCH     | 0.53928134  | 0.29082437 | 0.03802352 |
| vsurf_CW4     | -0.76999267 | 0.59288871 | 0.00078536 | TopoPSA       | -0.68009975 | 0.46253567 | 0.00527322 | SMR_VSA5     | 0.63404362  | 0.40201131 | 0.01113683 | PEOE_VSA_F  | -0.58634934 | 0.34380555 | 0.02159934 | MATS2s      | 0.53881488  | 0.29032148 | 0.03822276 |
| PEOE_VSA1     | -0.76827196 | 0.59024181 | 0.00082064 | TPSA          | -0.68009973 | 0.46253564 | 0.00527323 | vsurf_D6     | 0.63380662  | 0.40171084 | 0.01117643 | PEOE_VSA_F  | 0.58634913  | 0.3438053  | 0.0215994  | AATS5se     | -0.5387478  | 0.2902492  | 0.03825147 |
| AMID_h        | -0.75769968 | 0.5741088  | 0.0106666  | MATS8i        | 0.67832562  | 0.46012565 | 0.00543989 | ATSC0are     | -0.63294949 | 0.40062505 | 0.01132057 | ATSC0s      | -0.58547514 | 0.34278114 | 0.02184353 | vsurf_ID8   | -0.53831641 | 0.28978456 | 0.03843653 |
| vsurf_HB5     | -0.75683009 | 0.57279178 | 0.0108929  | vsurf_ID4     | -0.67827204 | 0.46005296 | 0.00544498 | GATS5se      | 0.63113841  | 0.39833569 | 0.0116299  | GCUT_SLOG   | 0.58398856  | 0.34104264 | 0.0222636  | AMID_O      | -0.53704929 | 0.28842194 | 0.03898396 |
| GATS1are      | -0.75540975 | 0.57064389 | 0.0112709  | h_ema         | -0.6777943  | 0.45940512 | 0.0054906  | E_ang        | -0.63038213 | 0.39738163 | 0.01176099 | MATS8are    | -0.58379599 | 0.34081776 | 0.02231846 | vsurf_HB6   | -0.53697036 | 0.28833717 | 0.03901825 |
| MIC0          | -0.74963639 | 0.56195471 | 0.01129181 | AATS1se       | -0.67716037 | 0.45854617 | 0.0055516  | GATS5pe      | 0.62965638  | 0.39646716 | 0.01188788 | vsurf_W6    | -0.58313033 | 0.34004098 | 0.0225089  | AATSC7p     | 0.53560953  | 0.28687757 | 0.03961299 |
| FilterItLogS  | -0.74938344 | 0.56157555 | 0.01129945 | vsurf_ID1     | -0.67656951 | 0.45774631 | 0.00560893 | SIC0         | -0.62935612 | 0.39608912 | 0.01194068 | MATS2are    | 0.58311628  | 0.3400246  | 0.02251293 | vsurf_R     | 0.53486134  | 0.28607665 | 0.03994285 |
| PEOE_VSA6     | 0.74444567  | 0.55419936 | 0.01145601 | ETA_epsilon   | -0.6749637  | 0.455576   | 0.00576711 | GATS1s       | -0.62911365 | 0.39578399 | 0.01198345 | ATSC8p      | 0.58297663  | 0.33986176 | 0.02255305 | h_emd       | -0.53434526 | 0.28552485 | 0.04017156 |
| vsurf_HB4     | -0.73927012 | 0.5465203  | 0.01163608 | SM1_Dzp       | 0.67308754  | 0.45304684 | 0.00595637 | vsurf_CW6    | -0.62796234 | 0.39433671 | 0.01218818 | GATS6pe     | 0.58134333  | 0.33796007 | 0.02302627 | AATSC0pe    | -0.53389923 | 0.28504839 | 0.04037002 |
| SLogP         | 0.7390612   | 0.54621146 | 0.01164371 | BIC0          | -0.67171144 | 0.45119626 | 0.00609827 | SMR_VSA1     | -0.62662334 | 0.3926568  | 0.0124297  | vsurf_HB1   | -0.57808402 | 0.33418114 | 0.02399318 | ATSC7p      | 0.53356993  | 0.28469687 | 0.040517   |
| SlogP         | 0.73905793  | 0.54620662 | 0.01164383 | MID_h         | -0.67144934 | 0.45084422 | 0.0061256  | AATSC0se     | -0.62564902 | 0.39143669 | 0.01260775 | PEOE_VSA_F  | -0.57582497 | 0.33157439 | 0.02468126 | MINaasC     | 0.53294726  | 0.28403279 | 0.04079602 |
| ETA_dAlpha_B  | -0.73451808 | 0.53951681 | 0.0118168  | GATS3c        | 0.6707835   | 0.44995051 | 0.00619545 | vsurf_IW4    | -0.62425279 | 0.38969155 | 0.01286635 | ZMIC1       | 0.57431272  | 0.32983511 | 0.02515017 | AATS7p      | 0.53253159  | 0.28358989 | 0.04098307 |
| logP(o/w)     | 0.72697365  | 0.52849069 | 0.0021364  | vsurf_IW5     | -0.67064467 | 0.44976428 | 0.0062101  | ETA_dEpsilon | -0.62128127 | 0.38599042 | 0.01343041 | vsurf_D7    | 0.57416598  | 0.32966657 | 0.02519603 | MATS7p      | 0.53242441  | 0.28347575 | 0.04103141 |
| h_logS        | -0.72563495 | 0.52654609 | 0.00219754 | ASA_H         | 0.67011081  | 0.44904849 | 0.00626667 | ATSC0se      | -0.61729156 | 0.38104887 | 0.01421765 | GATS6s      | 0.57398556  | 0.32945942 | 0.0252525  | vsurf_W2    | -0.529017   | 0.27985899 | 0.04259025 |
| ETA_dPsi_A    | -0.72530593 | 0.52606869 | 0.00221278 | Q_VSA_POL     | -0.66946078 | 0.44817773 | 0.00633609 | vsurf_ID6    | -0.61542145 | 0.37874356 | 0.01459871 | vsurf_Wp4   | -0.572074   | 0.32726866 | 0.02585672 | nO          | -0.52852751 | 0.27934133 | 0.04281774 |
| vsurf_A       | -0.72465225 | 0.52512088 | 0.00224332 | h_logD        | 0.66593371  | 0.4434677  | 0.00672343 | DPSA5        | -0.6145084  | 0.37762058 | 0.0147876  | vsurf_D8    | 0.57066625  | 0.32565996 | 0.02630867 | MATS7v      | 0.52580347  | 0.27646928 | 0.04410025 |
| Q_VSA_FHYD    | 0.72191997  | 0.52116845 | 0.00237461 | Q_VSA_HYD     | 0.6655985   | 0.44302136 | 0.00676119 | GATS4c       | 0.61417038  | 0.37720526 | 0.01485801 | AATS0are    | -0.57049223 | 0.32546138 | 0.02636495 | vsurf_Wp5   | -0.52337631 | 0.27392276 | 0.04526676 |
| Q_VSA_FPOL    | -0.72191996 | 0.52116843 | 0.00237461 | vsurf_HB2     | -0.66355564 | 0.44030609 | 0.00699494 | AATS1pe      | -0.61379031 | 0.37673855 | 0.01493748 | chi0_C      | 0.56919809  | 0.32398647 | 0.02678635 | MINdssC     | 0.52106428  | 0.27150799 | 0.04639901 |
| vsurf_CW3     | -0.71857731 | 0.51635335 | 0.00254354 | GATS4se       | 0.66173079  | 0.43788764 | 0.00720907 | ATSC0pe      | -0.61363801 | 0.37655161 | 0.01496942 | IC1         | -0.56832963 | 0.32299857 | 0.02707199 | GATS2s      | -0.52065734 | 0.27108406 | 0.04660044 |
| lip_acc       | -0.71843266 | 0.51614549 | 0.00255106 | GATS4pe       | 0.65843307  | 0.43353411 | 0.00760909 | ATSC1c       | 0.61355284  | 0.37641171 | 0.01499244 | SsOH        | -0.5681269  | 0.32276818 | 0.027139   | GATS7v      | -0.51948808 | 0.26986786 | 0.04718281 |
| ETA_epsilon_2 | -0.7176485  | 0.51501937 | 0.00259215 | ATSC8i        | 0.65780004  | 0.43270089 | 0.00768783 | vsurf_HL2    | -0.60837424 | 0.37011922 | 0.01610606 | PEOE_VSA-4  | -0.56785491 | 0.3224592  | 0.0272291  | DCASA       | -0.51931874 | 0.26969196 | 0.0472676  |
| logS          | -0.71503937 | 0.51128129 | 0.00273268 | AATSC0are     | -0.65640788 | 0.43087131 | 0.00786325 | GATS6are     | 0.60807504  | 0.36975525 | 0.01617261 | PEOE_VSA_P  | -0.56785491 | 0.3224592  | 0.0272291  | vsurf_CW2   | -0.51911546 | 0.26948086 | 0.04736953 |
| SM1_Dzv       | 0.71335858  | 0.50888047 | 0.00282639 | MIC1          | -0.65622248 | 0.43062795 | 0.00788685 | AATSC1c      | 0.60662344  | 0.367992   | 0.01649849 | nHBDon      | -0.56785491 | 0.3224592  | 0.0272291  | PM3_HF      | 0.51860268  | 0.26894874 | 0.04762736 |
| h_logP        | 0.71042416  | 0.50470249 | 0.00299613 | GATS4are      | 0.65614381  | 0.4305247  | 0.00789688 | GATS6se      | 0.60550791  | 0.36663982 | 0.01675234 | MATS8pe     | -0.56494367 | 0.31916135 | 0.02820771 | AATSC7v     | 0.51841163  | 0.26875062 | 0.04772369 |
| a_ICM         | -0.7086862  | 0.50223613 | 0.00310044 | AATSC0pe      | -0.65558933 | 0.42979736 | 0.00796785 | EState_VSA8  | 0.60496148  | 0.36597839 | 0.01687778 | VSA_EState3 | -0.5641704  | 0.31828824 | 0.02847206 | ATSC7v      | 0.51743375  | 0.26773769 | 0.04821899 |
| IC0           | -0.70868603 | 0.50223589 | 0.00310045 | vsurf_D1      | 0.65423755  | 0.42802677 | 0.00814297 | MINssCH2     | 0.603711    | 0.36446697 | 0.01716756 | MATS2pe     | 0.56352279  | 0.31755793 | 0.02869489 | vsurf_Wp3   | -0.51706302 | 0.26735416 | 0.04840776 |
| SM1_Dzi       | -0.70834328 | 0.50175021 | 0.00312136 | vsurf_IW3     | -0.65264669 | 0.4259477  | 0.00835292 | PEOE_VSA-6   | -0.60192894 | 0.36231845 | 0.01758712 | chi1v_C     | 0.5632337   | 0.31723221 | 0.02879478 | GATS1pe     | -0.51548378 | 0.26572352 | 0.04921796 |

**Table S2** 220 chemical descriptors that significantly (p<0.05) correlate to selective toxicity against OSCC cells
